# Supplementary figures and images for: Reconstructing extrachromosomal DNA structural heterogeneity from long-read sequencing data using Decoil
Source: HighWire-hosted journal article supplement (doi:10.1101/gr.279123.124), 2024-08-07

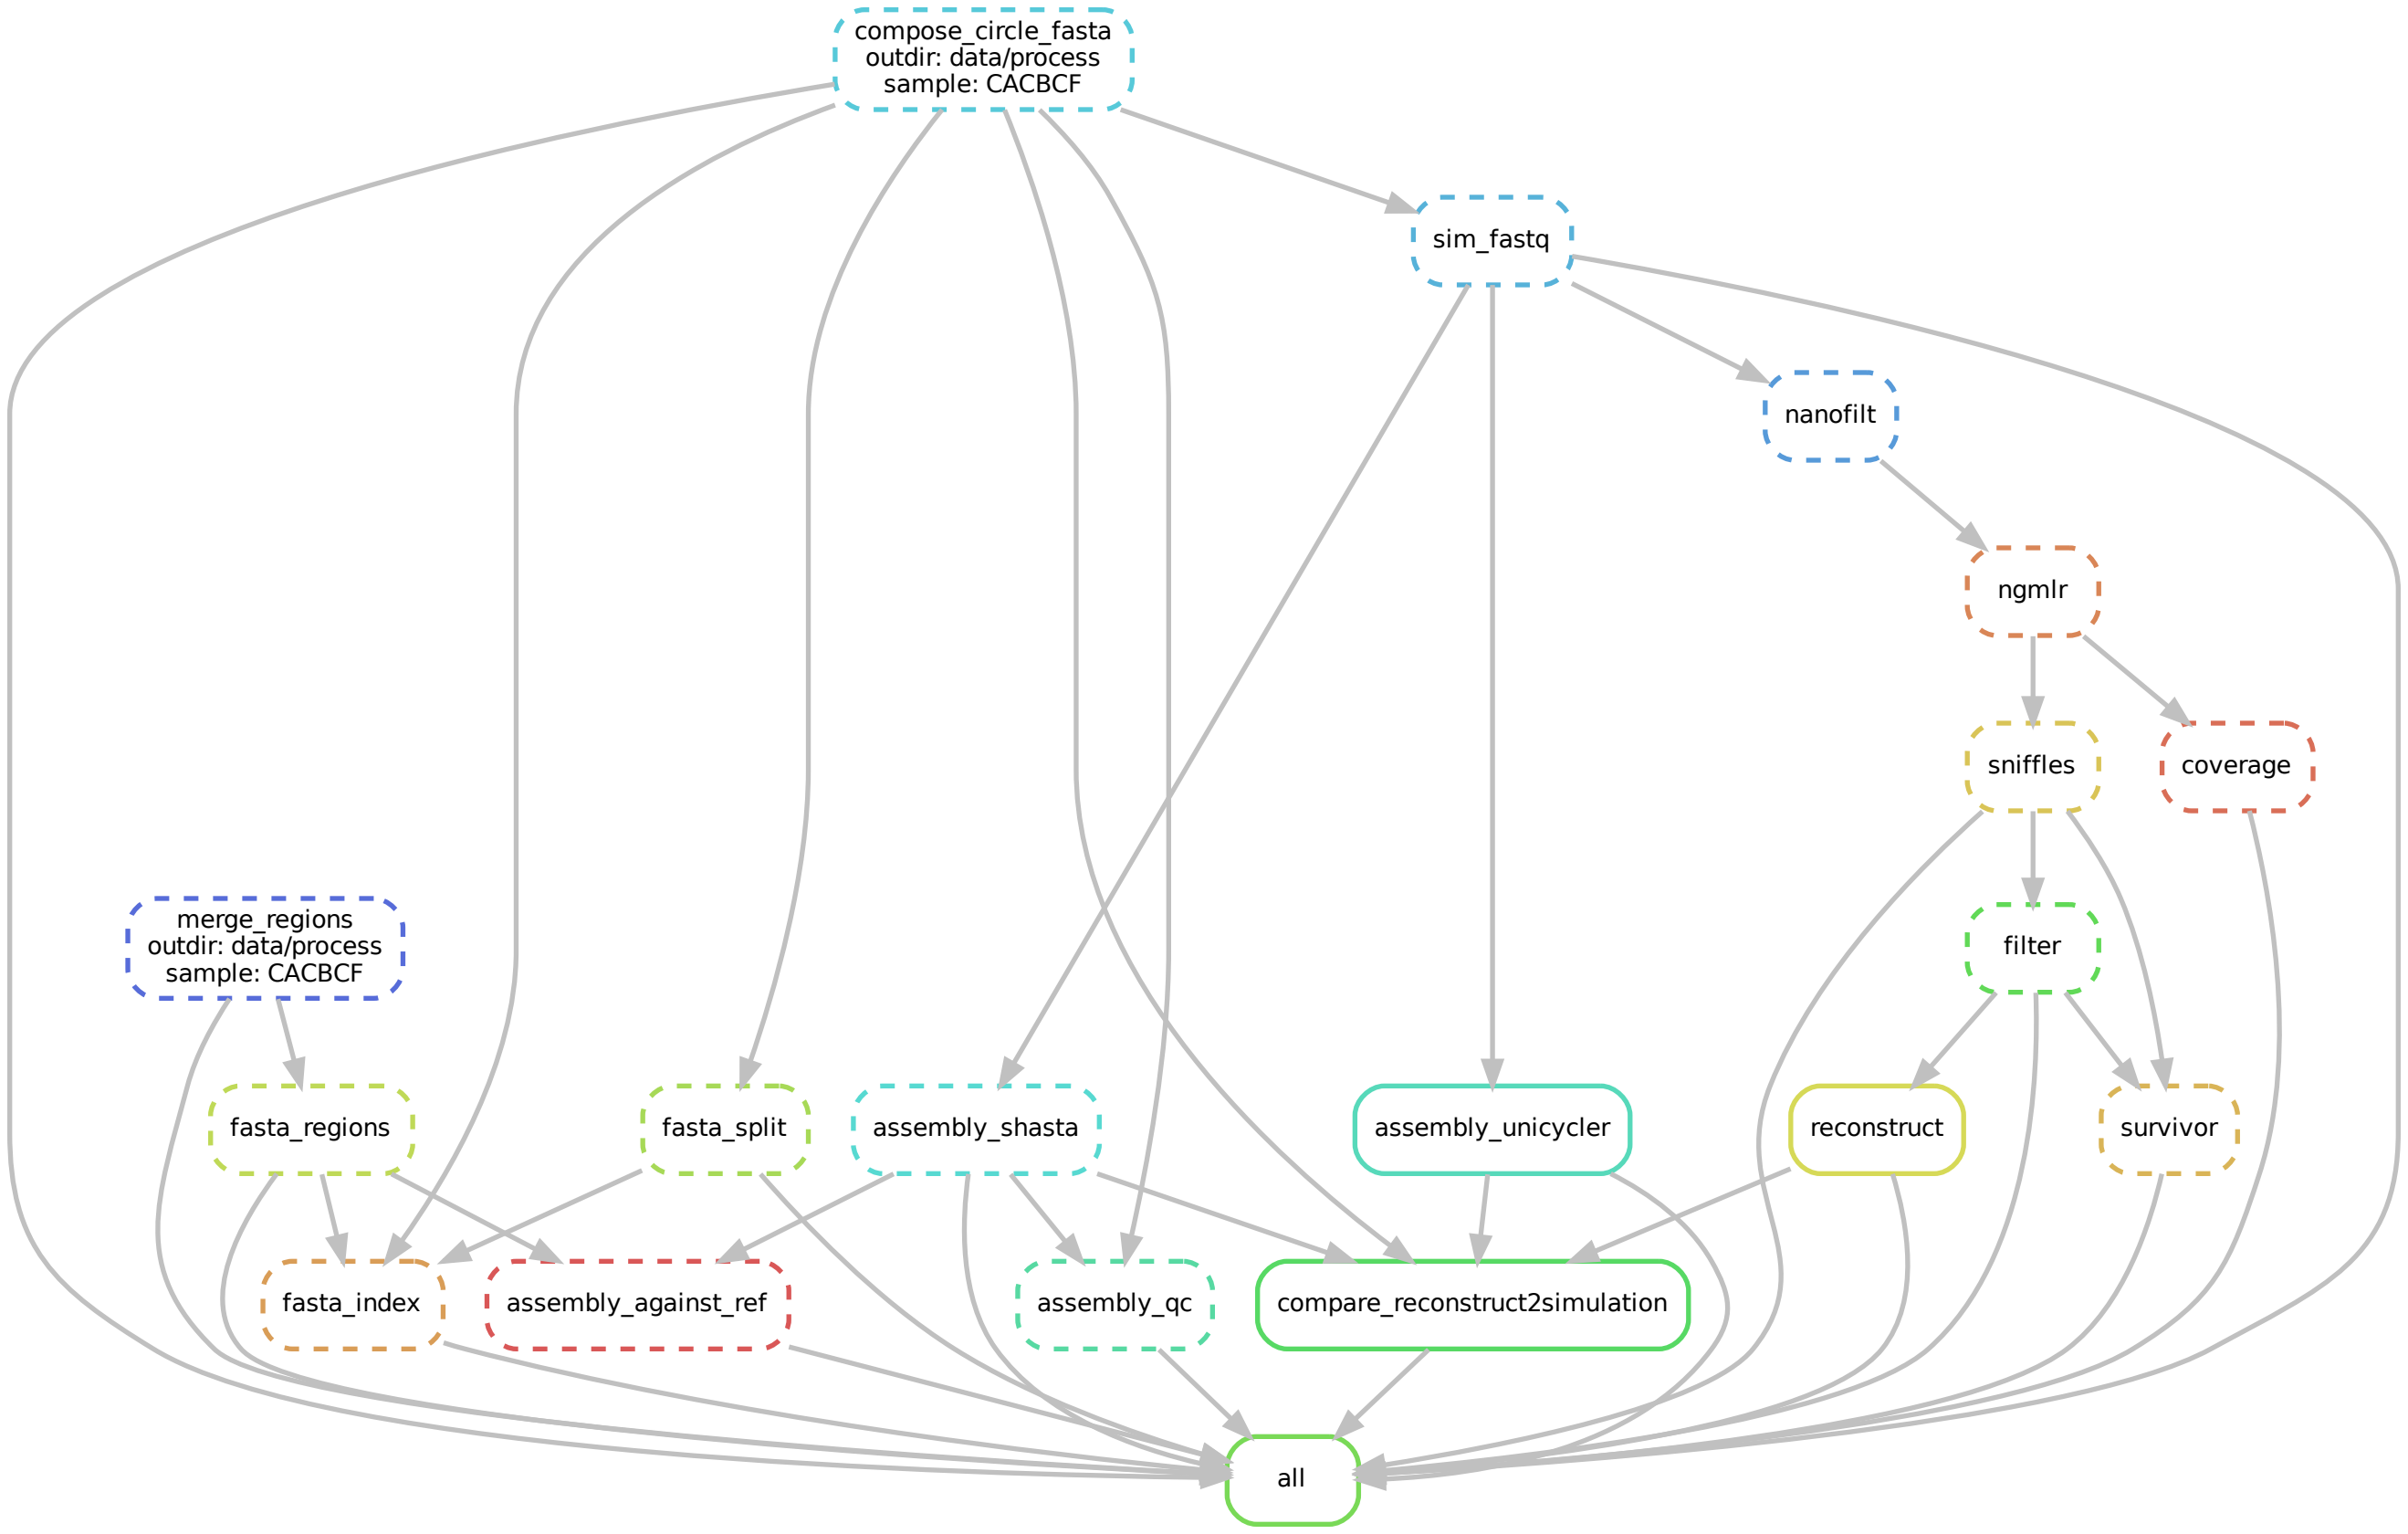

Supplement: Supplemental_Code.zip [file dag.pdf › ecDNA-simulate-validate-pipeline-1.0.1/dag.pdf]

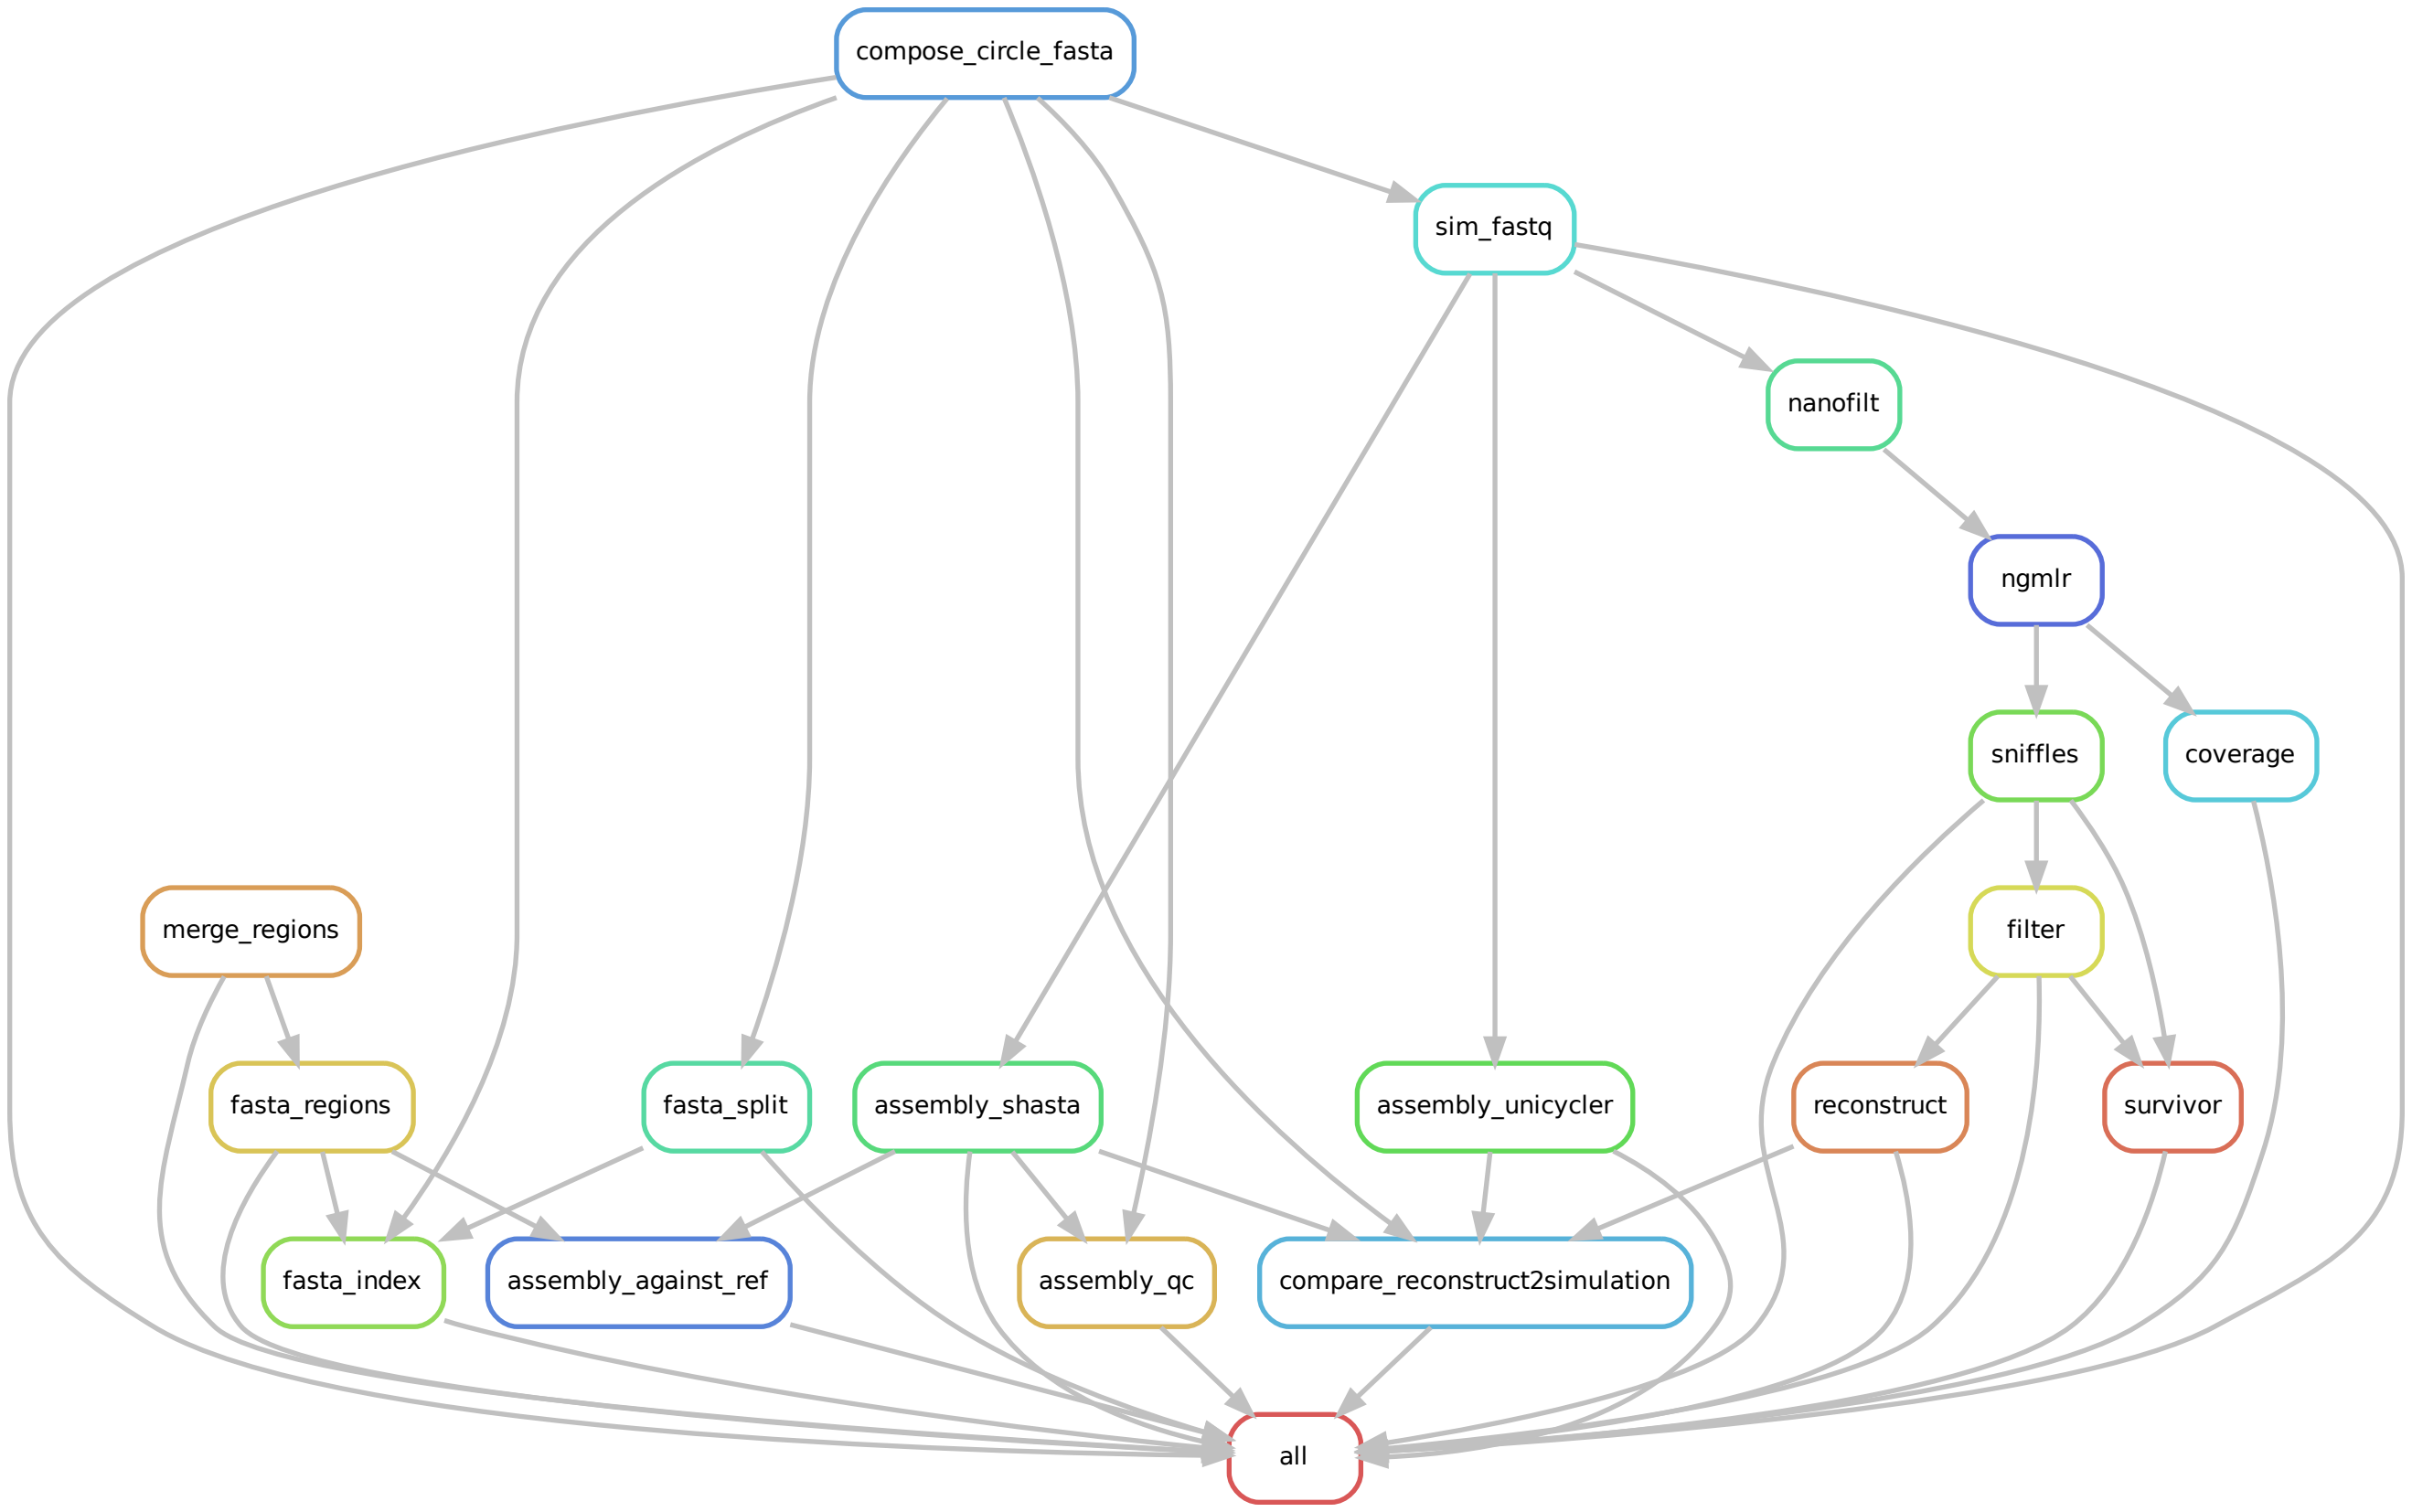

Supplement: Supplemental_Code.zip [file dag_simplified.pdf › ecDNA-simulate-validate-pipeline-1.0.1/dag_simplified.pdf]
